# Supplementary material for: Microvascular density assessed by CD31 predicts clinical benefit upon bevacizumab treatment in metastatic colorectal cancer: results of the PassionATE study, a translational prospective Phase II study of capecitabine and irinotecan plus bevacizumab followed by capecitabine and oxaliplatin plus bevacizumab or the reverse sequence in patients in mCRC
Source: PubMed Central journal article supplement — Ther Adv Med Oncol. 2020 Aug 18;12:1758835920928635. doi: 10.1177/1758835920928635 (PMC7446555; doi:10.1177/1758835920928635), 2020-08-18
Supplement: PassionATE_Supplementary_Methods.pdf [file PassionATE_Supplementary_Methods.pdf]

## Supplementary Methods

### Immunohistochemistry

Tissue was deparaffinized by using xylene two times (10 min), 100% ethanol (5 min) two times, 70% ethanol (5 min) and water (5 min). Peroxidase activity was blocked by using the Dual Endogenous Enzyme Block (Dako). Epitope retrieval was performed by heating the tissue sections immersed in Target Retrieval Solution (S1699, Dako) for one hour in a steamer. After cooling down, tissue was incubated with the primary antibodies (Table S1). The incubation time was 30 min at room temperature, except for CD31. CD31 primary antibody was incubated at 4°C overnight. For the subsequent steps, the EnVision+ Dual Link (HRP. Rabbit/Mouse, K4063, Dako) was used according to manufacturer's instructions. Of note, the secondary antibody used for the immunostaining against CD98hc was the polyclonal rabbit anti-goat Immunoglobulins/HRP (P0449, Dako). Chromogenic detection for  $\alpha$ V-integrin and NRP1 was performed using the SignalStain® DAB Substrate Kit (#8059, Cell Signaling).

**Table S1: Primary antibodies used in the study.**

| Target               | Primary antibody (clone)     | Catalogue number | Company                  | Dilution | Tissue used as positive control |
|----------------------|------------------------------|------------------|--------------------------|----------|---------------------------------|
| $\alpha$ V- integrin | Rabbit monoclonal (EPR16800) | ab179475         | Abcam                    | 1:200    | Kidney                          |
| CD31                 | Mouse monoclonal (JC70A)     | M0823            | DAKO                     | 1:20     | Tonsil                          |
| NRP1                 | Rabbit monoclonal (EPR3113)  | ab81321          | Abcam                    | 1:200    | Lung cancer                     |
| uPAR                 | Rabbit polyclonal            | TA323492         | Origene                  | 1:80     | Breast cancer                   |
| PTEN                 | Rabbit monoclonal (138G6)    | #9559            | Cell Signaling           | 1:100    | Breast cancer                   |
| CD98hc               | Goat polyclonal (C-20)       | sc-7095          | Santa Cruz Biotechnology | 1:200    | Pancreatic cancer               |
