# Supplementary material for: Microvascular density assessed by CD31 predicts clinical benefit upon bevacizumab treatment in metastatic colorectal cancer: results of the PassionATE study, a translational prospective Phase II study of capecitabine and irinotecan plus bevacizumab followed by capecitabine and oxaliplatin plus bevacizumab or the reverse sequence in patients in mCRC
Source: PubMed Central journal article supplement — Ther Adv Med Oncol. 2020 Aug 18;12:1758835920928635. doi: 10.1177/1758835920928635 (PMC7446555; doi:10.1177/1758835920928635), 2020-08-18
Supplement: Supplemental_List_1.pdf [file Supplemental_List_1.pdf]

## **Ethics statement**

The present study protocol (ML25153 Passion, EudraCT-Nr.: 2011-002191-16) was approved by the respective ethics committees under the number 2011/548:

AKH Wien

Landeskrankenhaus Graz

Landeskrankenhaus Wiener Neustadt

LKH Feldbach-Fürstenfeld

Hanusch-Krankenhaus

Landeskrankenhaus Salzburg

Krankenhaus der Barmherzigen Schwestern *Ried*

LKH-Hochsteiermark – Leoben

Landeskrankenhaus Waidhofen/Thaya

Landeskrankenhaus Krems

LKH Steyr

Landeskrankenhaus Innsbruck
